# Supplementary material for: New understanding on the reaction pathways of the polyacrylonitrile copolymer fiber pre-oxidation: online tracking by two-dimensional correlation FTIR spectroscopy
Source: Royal Society of Chemistry journal article supplement (doi:10.1039/c5ra24320c), 2015-12-22
Supplement: c5ra24320c1.pdf [file c5ra24320c1.pdf]

## Supporting Information

# **New Understanding on the Reaction Pathways of the Polyacrylonitrile Copolymer Fiber Pre-Oxidation: Online Tracking by Two-Dimensional Correlation FTIR Spectroscopy**

*Jing Zhao, Jihai Zhang, Tao Zhou, \* Xifei Liu, Qiang Yuan, and Aiming Zhang*

State Key Laboratory of Polymer Materials Engineering of China, Polymer Research  
Institute, Sichuan University, Chengdu 610065, China.

\*Corresponding author. Tel.: +86-28-85402601; Fax: +86-28-85402465; E-mail address:

zhoutaopoly@scu.edu.cn (T. Zhou)

---

## 1. Theory of scaling-MW2D based on auto-correlation

$W(\nu, I)$  is a  $M \times N$  spectral intensity matrix.  $\nu$  and  $I$  are spectral variable (e.g., wavenumber) and perturbation variable (e.g., temperature), respectively.

$$W(\nu, I) = \begin{pmatrix} y(\nu, I_1) \\ \mathbf{M} \\ y(\nu, I_j) \\ \mathbf{M} \\ y(\nu, I_M) \end{pmatrix} \quad (1)$$

The reference spectrum and dynamic spectrum in the  $j$ th submatrix of  $W(\nu, I)$ :

$$\bar{y}(\nu) = \frac{1}{2m+1} \sum_{J=j-m}^{j+m} y(\nu, I_J) \quad (2)$$

$$\tilde{y}(\nu, I_J) = y(\nu, I_J) - \bar{y}(\nu) \quad (3)$$

where  $J$  corresponds to the index of rows. A mean-centered  $j$ th submatrix of  $W(\nu, I)$  is obtained.

$$w_j(\nu, I) = \begin{pmatrix} \tilde{y}(\nu, I_{j-m}) \\ \mathbf{M} \\ \tilde{y}(\nu, I_j) \\ \mathbf{M} \\ \tilde{y}(\nu, I_{j+m}) \end{pmatrix} \quad (4)$$

The  $w_j(\nu, I)$  has  $2m+1$  rows which is called the window size. The index range of the perturbation variable  $I$  of  $w_j(\nu, I)$  is from  $j-m$  to  $j+m$ .

The generalized synchronous 2D correlation spectra is calculated from  $w_j(\nu, I)$ :

$$\Phi_j(\nu_1, \nu_2) = \frac{1}{2m} \sum_{J=j-m}^{j+m} \tilde{y}(\nu_1, I_J) \cdot \tilde{y}(\nu_2, I_J) \quad (5)$$

For each window, the standard deviations of spectral intensities at  $\nu_1$  and  $\nu_2$  are defined as follows.

$$\sigma(\nu_1) = \sqrt{\Phi_j(\nu_1, \nu_1)} \quad (6)$$

---


$$\sigma(v_2) = \sqrt{\Phi_j(v_2, v_2)} \quad (7)$$

The correlation coefficient  $\rho(v_1, v_2)$  is defined:

$$\rho(v_1, v_2) = \Phi_j(v_1, v_2) / [\sigma(v_1) \cdot \sigma(v_2)] \quad (8)$$

The scaled forms of the synchronous correlation spectrum in each window are defined:

$$\Phi_j(v_1, v_2)^{(Scaled)} = \Phi_j(v_1, v_2) \cdot [\sigma(v_1) \cdot \sigma(v_2)]^{-\alpha} \cdot |\rho(v_1, v_2)|^\beta \quad (9)$$

The constant  $\alpha$  is the scaling factor, and  $\beta$  is correlation enhance factor. The value of  $\alpha$  is limited to 0–1.0.

For scaling-MW2D based on auto-correlation, the each row of the correlation matrix of scaling-MW2D is directly extracted from a diagonal line of  $\Phi_j^{(Scaled)}$  matrix, namely  $v_1=v_2$ . Thus, the auto-correlation scaling-MW2D can be described below.

$$\Phi_j(v_1, v_1)^{(Scaled)} = \Phi_j(v_1, v_1) \cdot [\sigma(v_1) \cdot \sigma(v_1)]^{-\alpha} \cdot |\rho(v_1, v_1)|^\beta \quad (10)$$

$$\rho(v_1, v_1) = \Phi_j(v_1, v_1) / [\sigma(v_1) \cdot \sigma(v_1)] = 1 \quad (11)$$

$$\Phi_j(v_1, v_1)^{(Scaled)} = [\Phi_j(v_1, v_1)]^{1-\alpha} \quad (12)$$

The auto-correlation scaling-MW2D correlation spectrum is gained *via* sliding window position from  $j=l+m$  to  $M-m$  and repeating calculations of equation (2)-(12) at each window. In the present study, the scaling factor was chosen as  $\alpha=0.7$ . The detailed theory and algorithm of scaling-MW2D can refer to the Ref.<sup>1</sup>

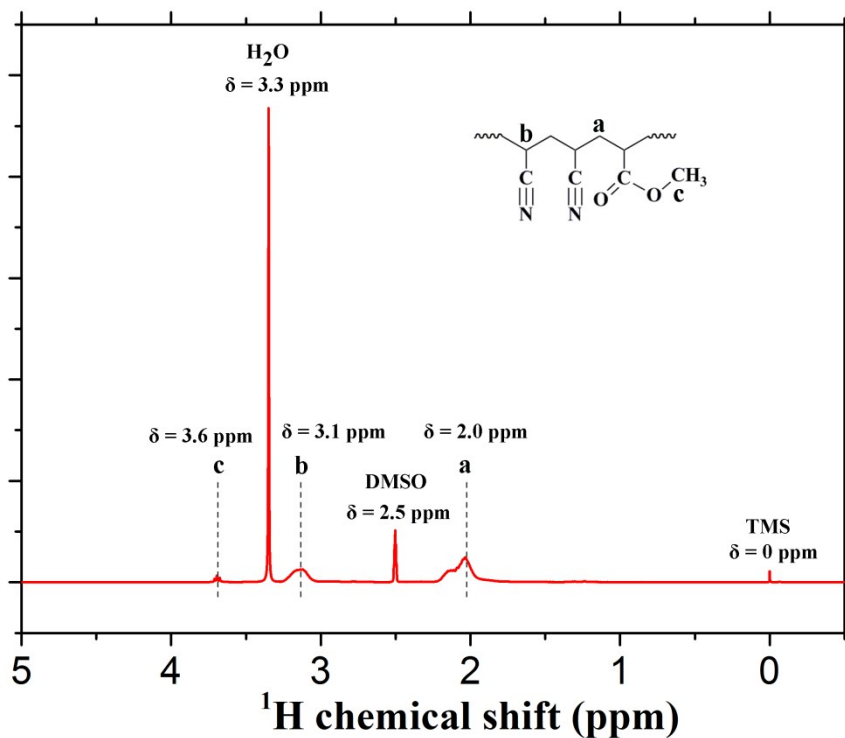

**Figure S1.**  $^1\text{H}$  NMR of polyacrylonitrile (PAN) copolymer fibers.

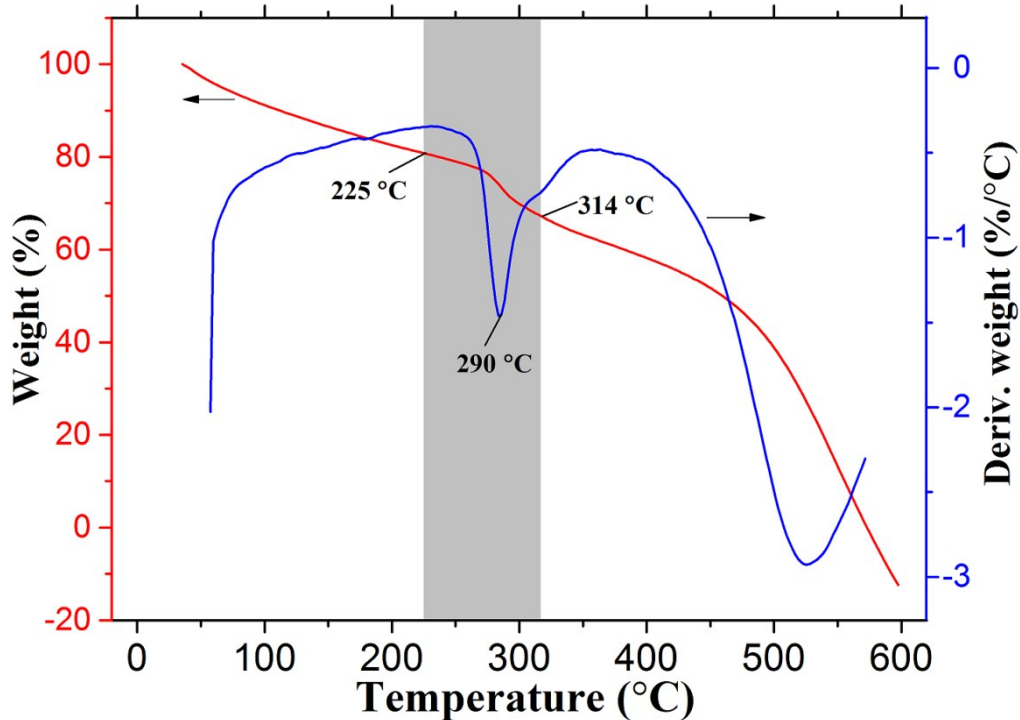

**Figure S2.** TGA and DTG curves of PAN copolymer fibers at  $5^{\circ}\text{C}/\text{min}$  upon heating from  $40^{\circ}\text{C}$  to  $600^{\circ}\text{C}$  under air atmosphere.

**Table S1.** GPC results of PAN copolymer fibers

| $M_n$ (g/mol) | $M_w$ (g/mol) | $M_p$ (g/mol) | $M_z$ (g/mol) | $M_{z+1}$ (g/mol) | Polydispersity<br>( $M_w/M_n$ ) |
|---------------|---------------|---------------|---------------|-------------------|---------------------------------|
| 686293        | 1341401       | 2850697       | 1842718       | 2162305           | 1.954560                        |

**Table S2.** The bands assignments of FTIR spectra for PAN copolymer fibers and pre-oxidized PAN copolymer fibers.

| Wavenumber (cm <sup>-1</sup> ) | Assignments                                                                                                      | Explanations                                                                          | References |
|--------------------------------|------------------------------------------------------------------------------------------------------------------|---------------------------------------------------------------------------------------|------------|
| 3371                           | $\nu(\text{O-H})$                                                                                                | O-H stretching of O-H groups                                                          | 2, 3       |
| 3224                           | $\nu(\text{N-H})$                                                                                                | N-H stretching of N-H groups                                                          | 2-4        |
| 2940                           | $\nu_{as}(-\text{CH}_2-)$                                                                                        | C-H asymmetrical stretching of $-\text{CH}_2-$ groups                                 | 5-7        |
| 2243                           | $\nu(\text{C}\equiv\text{N})$                                                                                    | C $\equiv$ N stretching of $-\text{C}\equiv\text{N}$ groups                           | 2, 8-10    |
| 2195                           | $\nu(\text{C}\equiv\text{N}, \beta\text{-amino})$                                                                | C $\equiv$ N stretching of $-\text{C}\equiv\text{N}$ groups in $\beta$ -amino nitrile | 11, 12     |
| 1733                           | $\nu(\text{C}=\text{O}, \text{MMA})$                                                                             | C=O stretching of carbonyl groups originated from methyl methacrylate (MMA)           | 2, 13-15   |
| 1650                           | $\nu(\text{C}=\text{O}, \text{cyclic})$                                                                          | C=O stretching on the cyclic structure                                                | 16, 17     |
| 1626                           | $\delta(\text{O-H}, \text{absorbed water})$                                                                      | O-H bending of the absorbed water                                                     | 18         |
| 1610                           | $\nu(\text{C}=\text{C}, \text{cyclic})$                                                                          | C=C stretching on the cyclic structure                                                | 16, 17     |
| 1580                           | $\nu(\text{C}=\text{N}, \text{cyclic})$                                                                          | C=N stretching on the cyclic structure                                                | 16, 17     |
| 1454                           | $\delta(-\text{CH}_2-)$                                                                                          | C-H bending of $-\text{CH}_2-$ groups                                                 | 2, 5       |
| 1380                           | $\delta(\text{C-H}, \text{rings})+$<br>$\delta(\text{N-H}, \text{rings})+$<br>$\delta(\text{O-H}, \text{rings})$ | C-H, N-H, and O-H bending in rings                                                    | 2, 17      |
| 1358                           | $\delta(\text{CH})+\omega(-\text{CH}_2-)$                                                                        | C-H bending of CH groups + C-H wagging of $-\text{CH}_2-$ groups                      | 19, 20     |
| 1250                           | $\omega(\text{CH})$                                                                                              | C-H wagging of CH groups                                                              | 19, 21     |
| 1232                           | $\nu(\text{C-C})+$ $\nu(\text{C-N})+$<br>$\nu(\text{C-O})$                                                       | C-C, C-N, and C-O stretching                                                          | 22, 23     |
| 1150                           | $\nu(\text{C-O-C})$                                                                                              | C-O-C stretching                                                                      | 2, 24      |
| 1073                           | $\nu_s(\text{C-CN})$                                                                                             | C-C symmetrical stretching of C-CN                                                    | 17, 25     |

**Table S3.** Sequential order of the bands of absorbed water, C=O groups in MMA, and C≡N groups in AN obtained from **Figure 6**.

| Cross correlation peak<br>(cm <sup>-1</sup> , cm <sup>-1</sup> )                                              | Sign in<br>synchronous<br>spectra | Sign in<br>asynchronous<br>spectra | Sequential order |
|---------------------------------------------------------------------------------------------------------------|-----------------------------------|------------------------------------|------------------|
| (1733, 1626)                                                                                                  | +                                 | -                                  | 1733←1626        |
| (1733, 2243)                                                                                                  | +                                 | +                                  | 1733→2243        |
| (1626, 2243)                                                                                                  | +                                 | +                                  | 1626→2243        |
| 1626 cm <sup>-1</sup> →1733 cm <sup>-1</sup> →2243 cm <sup>-1</sup>                                           |                                   |                                    |                  |
| $\delta(\text{O-H, absorbed water}) \rightarrow \nu(\text{C=O, MMA}) \rightarrow \nu(\text{C}\equiv\text{N})$ |                                   |                                    |                  |

**Table S4.** Sequential order of the bands of functional groups involved in the main process of the PAN fibers pre-oxidation.

| Cross correlation<br>peak (cm <sup>-1</sup> , cm <sup>-1</sup> ) | Sign in<br>synchronous<br>spectra | Sign in<br>asynchronous<br>spectra | Sequential order |
|------------------------------------------------------------------|-----------------------------------|------------------------------------|------------------|
| (3371, 3224)                                                     | +                                 | 0                                  | 3371=3224        |
| (3371, 2940)                                                     | -                                 | -                                  | 3371→2940        |
| (3371, 2243)                                                     | -                                 | -                                  | 3371→2243        |
| (3371, 2195)                                                     | +                                 | +                                  | 3371→2195        |
| (3371, 1733)                                                     | -                                 | +                                  | 3371←1733        |
| (3371, 1650)                                                     | +                                 | +                                  | 3371→1650        |
| (3371, 1610)                                                     | +                                 | -                                  | 3371←1610        |
| (3371, 1580)                                                     | +                                 | -                                  | 3371←1580        |
| (3371, 1150)                                                     | +                                 | +                                  | 3371→1150        |
| (3224, 2940)                                                     | -                                 | -                                  | 3224→2940        |
| (3224, 2243)                                                     | -                                 | -                                  | 3224→2243        |
| (3224, 2195)                                                     | +                                 | +                                  | 3224→2195        |
| (3224, 1733)                                                     | -                                 | +                                  | 3224←1733        |
| (3224, 1650)                                                     | +                                 | +                                  | 3224→1650        |
| (3224, 1610)                                                     | +                                 | -                                  | 3224←1610        |
| (3224, 1580)                                                     | +                                 | -                                  | 3224←1580        |
| (3224, 1150)                                                     | +                                 | +                                  | 3224→1150        |
| (2940, 2243)                                                     | +                                 | -                                  | 2940←2243        |
| (2940, 2195)                                                     | -                                 | +                                  | 2940←2195        |
| (2940, 1733)                                                     | +                                 | -                                  | 2940←1733        |
| (2940, 1650)                                                     | -                                 | +                                  | 2940←1650        |
| (2940, 1610)                                                     | -                                 | +                                  | 2940←1610        |
| (2940, 1580)                                                     | -                                 | +                                  | 2940←1580        |
| (2940, 1150)                                                     | -                                 | +                                  | 2940←1150        |
| (2243, 2195)                                                     | -                                 | -                                  | 2243→2195        |

|                                                                                                                                                                   |   |   |           |
|-------------------------------------------------------------------------------------------------------------------------------------------------------------------|---|---|-----------|
| (2243, 1733)                                                                                                                                                      | + | - | 2243←1733 |
| (2243, 1650)                                                                                                                                                      | - | + | 2243←1650 |
| (2243, 1610)                                                                                                                                                      | - | + | 2243←1610 |
| (2243, 1580)                                                                                                                                                      | - | + | 2243←1580 |
| (2243, 1150)                                                                                                                                                      | - | + | 2243←1150 |
| (2195, 1733)                                                                                                                                                      | - | + | 2195←1733 |
| (2195, 1650)                                                                                                                                                      | + | - | 2195←1650 |
| (2195, 1610)                                                                                                                                                      | + | - | 2195←1610 |
| (2195, 1580)                                                                                                                                                      | + | - | 2195←1580 |
| (2195, 1380)                                                                                                                                                      | + | - | 2195←1380 |
| (2195, 1232)                                                                                                                                                      | + | - | 2195←1232 |
| (2195, 1150)                                                                                                                                                      | + | - | 2195←1150 |
| (1733,1650)                                                                                                                                                       | - | - | 1733→1650 |
| (1733,1610)                                                                                                                                                       | - | - | 1733→1610 |
| (1733,1580)                                                                                                                                                       | - | - | 1733→1580 |
| (1733,1150)                                                                                                                                                       | - | - | 1733→1150 |
| (1650,1610)                                                                                                                                                       | + | - | 1650←1610 |
| (1650,1580)                                                                                                                                                       | + | - | 1650←1580 |
| (1650,1150)                                                                                                                                                       | + | + | 1650→1150 |
| (1610,1580)                                                                                                                                                       | + | - | 1610←1580 |
| (1610,1150)                                                                                                                                                       | + | + | 1610→1150 |
| (1580,1150)                                                                                                                                                       | + | + | 1580→1150 |
| <hr/>                                                                                                                                                             |   |   |           |
| 1733 cm <sup>-1</sup> →1580 cm <sup>-1</sup> →1610 cm <sup>-1</sup> →3371 cm <sup>-1</sup> =3224 cm <sup>-1</sup> →1650 cm <sup>-1</sup> →1150 cm <sup>-1</sup> → |   |   |           |
| 2243 cm <sup>-1</sup> →2190 cm <sup>-1</sup> →2940 cm <sup>-1</sup>                                                                                               |   |   |           |
| <hr/>                                                                                                                                                             |   |   |           |
| ν(C=O, MMA)→ν(C=N, cyclic)→ν(C=C, cyclic)→ν(O-H)=ν(N-H)→ν(C=O, cyclic)→ν(C-O-C)→ν(C≡N)→ν(C≡N, β-amino)→ν <sub>as</sub> (-CH <sub>2</sub> -)                       |   |   |           |
| <hr/>                                                                                                                                                             |   |   |           |

## Reference

1. T. Zhou, Y. Liu, L. Peng, Y. Zhan, F. Liu, A. Zhang and L. Li, *Anal. Bioanal. Chem.*, 2014, **406**, 4157-4172.
2. N.-T. Ngoc Uyen and H. Sung Chul, *Macromolecules*, 2013, **46**, 5882-5889.
3. N. Grassie and R. McGuchan, *Eur. Polym. J.*, 1971, **7**, 1357-1371.
4. S. Deki, H. Nabika, K. Akamatsu, M. Mizuhata, A. Kajinami, S. Tomita, M. Fujii and S. Hayashi, *Thin Solid Films*, 2002, **408**, 59-63.
5. Y. Xue, J. Liu and J. Liang, *Polym. Degrad. Stab.*, 2013, **98**, 219-229.
6. T. Zhou, A. Zhang, C. Zhao, H. Liang, Z. Wu and J. Xia, *Macromolecules*, 2007, **40**, 9009-9017.
7. X. Liu, T. Zhou, Y. Liu, A. Zhang, C. Yuan and W. Zhang, *RSC Adv.*, 2015, **5**, 10231-10242.
8. T. Usami, T. Itoh, H. Ohtani and S. Tsuge, *Macromolecules*, 1990, **23**, 2460-2465.
9. S. C. Martin, J. J. Liggat and C. E. Snape, *Polym. Degrad. Stab.*, 2001, **74**, 407-412.

- 
10. A. Ju, Z. Liu, M. Luo, H. Xu and M. Ge, *J. Polym. Res.*, 2013, **20**, 1-17.
  11. L. Yaodong, C. Han Gi and S. Kumar, *Carbon*, 2011, 49, 4466-4476.
  12. K. L. Gallaher, D. Lukco and J. G. Grasselli, *Canadian Journal of Chemistry-Revue Canadienne De Chimie.*, 1985, **63**, 1960-1966.
  13. W. X. Zhang, J. Liu and G. Wu, *Carbon*, 2003, **41**, 2805-2812.
  14. J. M. V. Nabais, P. J. M. Carrott and M. Carrott, *Mater. Chem. Phys.*, 2005, **93**, 100-108.
  15. I. Karacan and G. Erdogan, *Fibers Polym.*, 2012, **13**, 329-338.
  16. N. Grassie and R. McGuchan, *Eur. Polym. J.*, 1972, **8**, 257-269.
  17. H. Kakida, K. Tashiro and M. Kobayashi, *Polym. J.*, 1996, **28**, 30-34.
  18. M. Liu, P. Wu, Y. Ding, G. Chen and S. Li, *Macromolecules*, 2002, **35**, 5500-5507.
  19. A. Ju, S. Guang and H. Xu, *Carbon*, 2013, **54**, 323-335.
  20. N. U. Nguyen-Thai and S. C. Hong, *Carbon*, 2014, **69**, 571-581.
  21. M. M. Coleman and G. T. Sivy, *Carbon*, 1981, **19**, 123-126.
  22. J. V. Ibarra, E. Munoz and R. Moliner, *Org. Geochem.*, 1996, **24**, 725-735.
  23. B. Xiao and K. M. Thomas, *Langmuir*, 2005, **21**, 3892-3902.
  24. J. Mittal, O. P. Bahl, R. B. Mathur and N. K. Sandle, *Carbon*, 1994, **32**, 1133-1136.
  25. C. Dick, E. Dominguez-Rosado, B. Eling, J. J. Liggat, C. I. Lindsay, S. C. Martin, M. H. Mohammed, G. Seeley and C. E. Snape, *Polymer*, 2001, **42**, 913-923.
